# Supplementary material for: Nessys: A new set of tools for the automated detection of nuclei within intact tissues and dense 3D cultures
Source: PLOS journal article supplement (doi:10.1371/journal.pbio.3000388), 2019-08-09
Supplement: S15 (10.1371/journal.pbio.3000388.s015) [file journal.pbio.3000388.s015]

**S3 Table: Description of the measures provided by the segmentation benchmarking tool**

| <b>ClusteringComparator</b>  | Name of the java class generating the measures listed below                                                                                                                 |
|------------------------------|-----------------------------------------------------------------------------------------------------------------------------------------------------------------------------|
| Jaccard Index                | Similarity measure (higher values are better)                                                                                                                               |
| Rand Index                   | Similarity measure (higher values are better)                                                                                                                               |
| Hausdorff Mean               | maximum of the set of minimal distances between two compared shapes (lower values are better)                                                                               |
| Hausdorff Std                | Standard deviation of the Hausdorff measure distribution                                                                                                                    |
| NSD Mean                     | Normalised Sum of distances : average distance of mis-labelled pixels by the automated method from the border of the reference shape in GT (lower values are better)        |
| NSD Std                      | Standard deviation of the NSD measure distribution                                                                                                                          |
| <b>SegmentationAccuracy</b>  | Name of the java class generating the measures listed below                                                                                                                 |
| Merge count                  | Number of merged events                                                                                                                                                     |
| Merge size Mean              | Average number of shapes per merge event                                                                                                                                    |
| Merge size Std               | Stand deviation of the distribution of the number of shapes per merge events                                                                                                |
| Miss                         | Number of miss events                                                                                                                                                       |
| Ref Number of Border Cells   | Number of shapes touching the image border in the GT image                                                                                                                  |
| Ref Total Number of Cells    | Total number of shapes in the GT image                                                                                                                                      |
| Split count                  | Number of split events                                                                                                                                                      |
| Split size Mean              | Average number of shapes per split event                                                                                                                                    |
| Split size Std               | Standard deviation of the distribution of the number of shapes per split events                                                                                             |
| Spurious                     | Number of spurious detection occurrences                                                                                                                                    |
| Stretch                      | Number of detected shapes in the tested image which overlap with more than one GT shape (at least 25 % of detected shape volume). This can encompass merged or split events |
| Test Number of Border Cells  | Number of shapes touching the image border in the tested image                                                                                                              |
| Tested Total Number of Cells | Total number of shapes in the tested image                                                                                                                                  |
